# Supplementary material
Source: PubMed Central journal article supplement (PMC7968282)
Supplement: 12903_2021_1476_MOESM2_ESM.pdf [file 12903_2021_1476_MOESM2_ESM.pdf]

**The effects of oral health education regarding periodontal health on non-dental  
undergraduates in southwestern China—exploring the feasibility of an e-  
learning course for oral health promotion**

Zhiwu Wu<sup>1#</sup>, Mingming Li<sup>1#</sup>, Fangzhi Zhu<sup>1</sup>, Lei Lei<sup>1</sup>, Ran Cheng<sup>1\*</sup>, Tao Hu<sup>1\*</sup>

<sup>1</sup>Department of Preventive Dentistry, State Key Laboratory of Oral Diseases, West  
China Hospital of Stomatology, Sichuan University, Chengdu, Sichuan, China;

# The authors contribute equally to the work

\* Corresponding authors:

Ran Cheng

Department of Preventive Dentistry, State Key Laboratory of Oral Diseases, West  
China Hospital of Stomatology, Sichuan University, Chengdu, Sichuan, China; Tel: 86-  
28-85503486; E-mail: [chengran@scu.edu.cn](mailto:chengran@scu.edu.cn)

and

Tao Hu

Department of Preventive Dentistry, State Key Laboratory of Oral Diseases, West  
China Hospital of Stomatology, Sichuan University, Chengdu, Sichuan, China; Tel: 86-  
28-85503486; E-mail: [hutao@scu.edu.cn](mailto:hutao@scu.edu.cn)

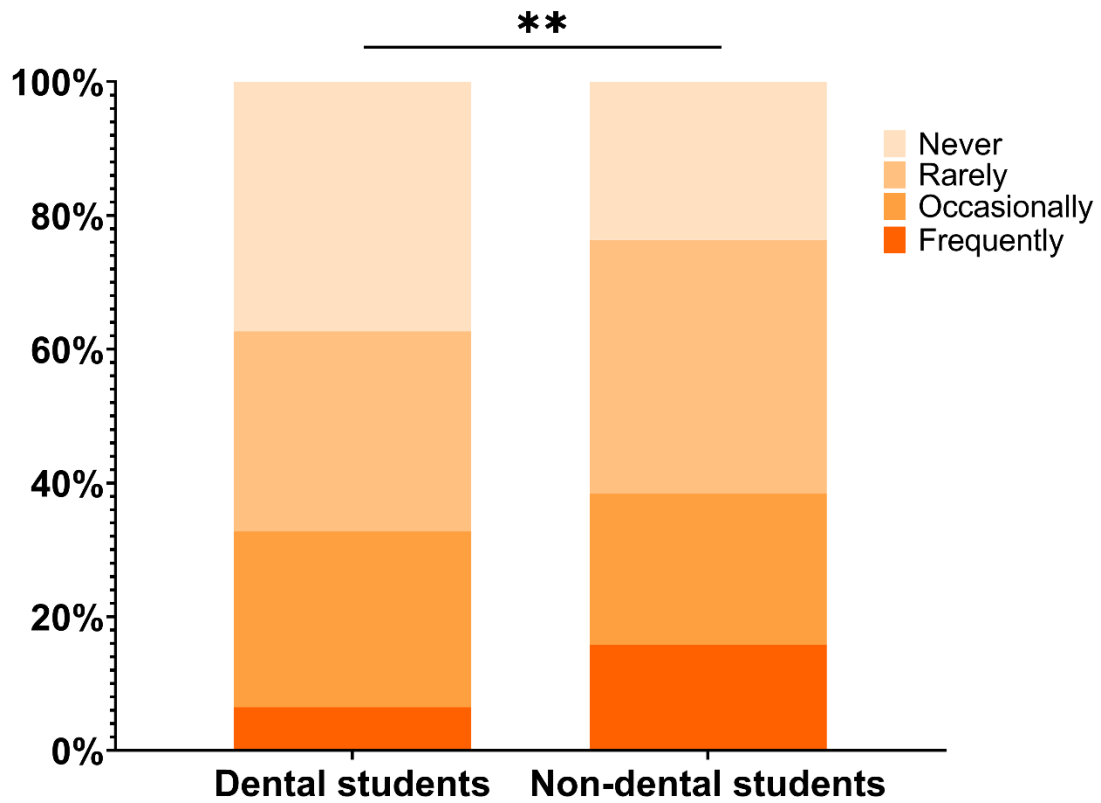

Supplementary Figure 2. Bleeding when brushing among dental and non-dental students in the last month (Chi-square test; \*\*  $P < 0.01$ ).
